# Supplementary material
Source: PubMed Central journal article supplement (PMC7158959)
Supplement: mmc1.pdf [file mmc1.pdf]

## Supplementary webappendix

This webappendix formed part of the original submission and has been peer reviewed.  
We post it as supplied by the authors.

Supplement to: To KKW, Chan JFW, Chen H, Li L, Yuen K-Y. Title. *Lancet Infect Dis* 2013;  
**12**: 809–821.

**Supplementary Table 1.** Epidemiological characteristics of patients with laboratory-confirmed human infection by avian influenza A(H7N9) virus (as of 26 June 2013).

| Case | Sex/age | Place of diagnosis    | Occupation / contact history                  | Date of symptom onset | Time between symptom onset & laboratory diagnosis (days) | Clinical condition (days after symptom onset) <sup>§</sup> | Symptomatic close contacts                                                                                                   |
|------|---------|-----------------------|-----------------------------------------------|-----------------------|----------------------------------------------------------|------------------------------------------------------------|------------------------------------------------------------------------------------------------------------------------------|
| 1    | M/87    | Shanghai              | Retired; 2 sons had pneumonia, 1 of whom died | 18 Feb 13             | 38                                                       | Dead (14)                                                  | 2 sons had pneumonia (case 77 survived and the other died)<br>1 contact of case 1 or 2 had fever, sore throat and runny nose |
| 2    | M/27    | Shanghai              | Pork seller                                   | 27 Feb 13             | 30                                                       | Dead (11)                                                  | 1 contact of case 1 or 2 had fever, sore throat and runny nose                                                               |
| 3    | F/35    | Anhui                 | Housewife; visited poultry market             | 13 Mar 13             | 14                                                       | Dead (27)                                                  | 0                                                                                                                            |
| 4    | F/45    | Jiangsu               | Abattoir worker                               | 19 Mar 13             | 11                                                       | Critical                                                   | 0/49                                                                                                                         |
| 5    | F/48    | Jiangsu               | Lumber worker                                 | 19 Mar 13             | 11                                                       | Critical                                                   | 0/60                                                                                                                         |
| 6    | M/83    | Jiangsu               | ?                                             | 20 Mar 13             | 12                                                       | Dead (20)                                                  | 0/15                                                                                                                         |
| 7    | F/32    | Jiangsu               | Unemployed                                    | 21 Mar 13             | 10                                                       | Dead (34)                                                  | 0/43                                                                                                                         |
| 8    | M/38    | Zhejiang              | Chef                                          | 7 Mar 13              | 25                                                       | Dead (20)                                                  | 0/125                                                                                                                        |
| 9    | M/68    | Zhejiang              | Retired, contacted poultry                    | 25 Mar 13             | 15                                                       | Critical                                                   | 0/58                                                                                                                         |
| 10   | M/64    | Zhejiang              | Farmer                                        | 29 Mar 13             | 6                                                        | Dead (7)                                                   | 0/55                                                                                                                         |
| 11   | M/48    | Shanghai              | Poultry transport worker                      | 28 Mar 13             | 7                                                        | Dead (6)                                                   | 0/8                                                                                                                          |
| 12   | F/67    | Shanghai              | Retired                                       | 22 Mar 13             | 13                                                       | Dead (22)                                                  | 0/3                                                                                                                          |
| 13   | F/52    | Shanghai              | Retired                                       | 27 Mar 13             | 7                                                        | Dead (7)                                                   | 1/31 (case 47)                                                                                                               |
| 14   | M/4     | Shanghai              | Kindergartener                                | 31 Mar 13             | 2                                                        | Discharged (10)                                            | 0/18                                                                                                                         |
| 15   | F/61    | Jiangsu               | Retired                                       | 20 Mar 13             | 16                                                       | Critical                                                   | 0/12                                                                                                                         |
| 16   | M/79    | Jiangsu               | Retired                                       | 21 Mar 13             | 15                                                       | Critical                                                   | 0/53                                                                                                                         |
| 17   | M/74    | Shanghai              | Farmer                                        | 28 Mar 13             | 9                                                        | Dead (14)                                                  | 0/5                                                                                                                          |
| 18   | M/66    | Shanghai              | Retired                                       | 29 Mar 13             | 8                                                        | Critical, discharged (20)                                  | 0/6                                                                                                                          |
| 19   | M/59    | Shanghai (from Anhui) | Retired                                       | 25 Mar 13             | 12                                                       | Dead (67)                                                  | 0/4                                                                                                                          |
| 20   | M/67    | Shanghai              | ?                                             | 29 Mar 13             | 9                                                        | Stable                                                     | 0/2                                                                                                                          |

|    |      |          |                                   |           |             |                      |                    |
|----|------|----------|-----------------------------------|-----------|-------------|----------------------|--------------------|
| 21 | M/55 | Anhui    | Animal market and abattoir worker | 28 Mar 13 | 9           | Stable               | 0/12               |
| 22 | M/64 | Shanghai | Retired                           | 1 Apr 13  | 6           | Dead (6)             | 0/4                |
| 23 | M/85 | Jiangsu  | Retired                           | 28 Mar 13 | 11          | Critical             | 0/34               |
| 24 | F/25 | Jiangsu  | Unemployed, pregnant              | 30 Mar 13 | 9           | Critical             | 0/18               |
| 25 | F/51 | Zhejiang | Retired, bought market poultry    | 13 Mar 13 | 25          | Stable               | ?                  |
| 26 | M/79 | Zhejiang | Retired                           | 29 Mar 13 | 11          | Critical             | ?                  |
| 27 | M/62 | Shanghai | Retired                           | 1 Apr 13  | 7           | Stable               | 0/5                |
| 28 | M/77 | Shanghai | Retired                           | 3 Apr 13  | 6           | Dead (11)            | 0/5                |
| 29 | M/65 | Zhejiang | Farmer                            | 3 Apr 13  | 7           | Stable               | ?                  |
| 30 | M/70 | Jiangsu  | ?                                 | 29 Mar 13 | 12          | Critical             | 0/18               |
| 31 | M/74 | Jiangsu  | ?                                 | 2 Apr 13  | 8           | Critical             | 0/13               |
| 32 | F/76 | Shanghai | Retired                           | 1 Apr 13  | 8           | Stable               | 0/4                |
| 33 | F/81 | Shanghai | Farmer                            | 4 Apr 13  | 5           | Stable               | 0/5                |
| 34 | M/31 | Jiangsu  | Chef                              | 31 Mar 13 | 11          | Critical             | 0/19               |
| 35 | M/56 | Jiangsu  | Teacher                           | 4 Apr 13  | 7           | Critical             | 0/33               |
| 36 | M/74 | Shanghai | Retired                           | 31 Mar 13 | 10          | Dead (11)            | 0/7                |
| 37 | F/83 | Shanghai | Retired                           | 2 Apr 13  | 8           | Stable               | 0/44               |
| 38 | M/68 | Shanghai | Retired                           | 4 Apr 13  | 6           | Stable               | 0/19               |
| 39 | M/53 | Shanghai | Freelancer                        | 3 Apr 13  | 8           | Critical             | 0/3                |
| 40 | M/86 | Shanghai | Retired                           | 3 Apr 13  | 8           | Dead (18)            | 0/13               |
| 41 | M/66 | Zhejiang | Retired                           | 8 Apr 13  | 4           | Stable               | ?                  |
| 42 | M/74 | Zhejiang | Retired                           | 6 Apr 13  | 6           | Stable               | ?                  |
| 43 | F/54 | Zhejiang | Farmer                            | 6 Apr 13  | 6           | Stable               | ?                  |
| 44 | F/7  | Beijing  | Student                           | 11 Apr 13 | 1           | Mild, discharged (6) | 1/24 (case 64)     |
| 45 | F/77 | Jiangsu  | ?                                 | 5 Apr 13  | 8           | Dead (9)             | 0/7                |
| 46 | M/72 | Jiangsu  | ?                                 | 1 Apr 13  | 12          | Critical             | 0/9                |
| 47 | M/56 | Shanghai | Husband of case 13                | 1 Apr 13  | 9           | Dead (86)            | 0/4                |
| 48 | M/65 | Zhejiang | Retired                           | 3 Apr 13  | 10          | Critical             | ?                  |
| 49 | M/38 | Zhejiang | Worker                            | 6 Apr 13  | 7           | Critical             | ?                  |
| 50 | M/34 | Henan    | Chef                              | 6 Apr 13  | 5           | Critical             | Case 50 & 51: 0/19 |
| 51 | M/65 | Henan    | Farmer                            | 8 Apr 13  | 3           | Stable               | Case 50 & 51: 0/19 |
| 52 | F/64 | Zhejiang | Farmer                            | 6 Apr 13  | $\leq 8^*$  | Critical             | ?                  |
| 53 | F/62 | Zhejiang | Retired                           | 29 Mar 13 | $\leq 16^*$ | Dead (22)            | ?                  |
| 54 | M/75 | Zhejiang | Retired                           | 9 Apr 13  | $\leq 5^*$  | Critical             | ?                  |
| 55 | M/79 | Zhejiang | Retired                           | 9 Apr 13  | $\leq 85^*$ | Critical             | ?                  |

|                    |         |                       |                                                   |           |             |                     |               |
|--------------------|---------|-----------------------|---------------------------------------------------|-----------|-------------|---------------------|---------------|
| 56                 | M/50    | Jiangsu               | ?                                                 | 1 Apr 13  | $\leq 13^*$ | ?                   | 0/8           |
| 57                 | M/26    | Jiangsu               | ?                                                 | 8 Apr 13  | 6           | Recovered (18)      | 0/21          |
| 58                 | M/73    | Shanghai              | Retired                                           | 5 Apr 13  | 8           | Stable              | 0/9           |
| 59                 | M/54    | Shanghai              | Freelancer                                        | 8 Apr 13  | 5           | Stable              | 0/9           |
| 60                 | M/78    | Shanghai              | Retired                                           | 4 Apr 13  | 9           | Stable              | 0/7           |
| 61                 | M/60    | Jiangsu               | ?                                                 | 6 Apr 13  | 9           | Dead (10)           | 0/3           |
| 62                 | F/68    | Zhejiang              | Farmer                                            | 3 Apr 13  | $\leq 12^*$ | Critical            | ?             |
| 63                 | M/60    | Anhui                 | Retired security guard                            | 10 Apr 13 | 4           | Critical            | 0/25          |
| A1                 | M/4     | Beijing               | Contact of case 44, parents sell poultry and pork | NA        | NA          | Asymptomatic        | ?             |
| 64                 | M/56    | Jiangsu               | ?                                                 | ?         | NA          | Critical            | 0/7           |
| 65                 | F/21    | Jiangsu               | ?                                                 | ?         | NA          | Critical            | 0/12          |
| 66                 | M/72    | Jiangsu               | ?                                                 | ?         | NA          | Critical            | 0/6           |
| 67                 | M/56    | Zhejiang              | Meat and pigeon seller                            | 12 Apr 13 | $\leq 4^*$  | Critical            | ?             |
| 68                 | M/57    | Zhejiang              | Unemployed                                        | 10 Apr 13 | $\leq 6^*$  | Critical            | ?             |
| 69                 | F/58    | Zhejiang              | Farmer                                            | 11 Apr 13 | $\leq 5^*$  | Critical            | ?             |
| 70                 | F/72    | Zhejiang              | Retired                                           | 10 Apr 13 | $\leq 6^*$  | Critical            | ?             |
| 71                 | M/62    | Zhejiang              | Retired                                           | 10 Apr 13 | $\leq 6^*$  | Critical            | ?             |
| 72                 | M/47    | Shanghai              | ?                                                 | 10 Apr 13 | 5           | Critical            | 0/21          |
| 73-75 <sup>†</sup> | ?       | Shanghai              | ?                                                 | March     | $\leq 15^†$ | 2 dead, 1 recovered | 0/34          |
| 76 <sup>†</sup>    | M/>60   | Shanghai              | ?                                                 | March     | $\leq 15^†$ | Recovered           | Son of case 1 |
| 77 <sup>†</sup>    | Child/2 | Hunan (from Shanghai) | Student                                           | 17 Mar 13 | 29          | Discharged (5)      | 0/9           |
| 78                 | M/89    | Shanghai              | ?                                                 | 12 Apr 13 | 4           | Stable              | 0/9           |
| 79                 | F/37    | Zhejiang              | Farmer                                            | ?         | NA          | Critical            | ?             |
| 80                 | M/74    | Zhejiang              | Retired                                           | ?         | NA          | Critical            | ?             |
| 81                 | M/86    | Zhejiang              | Retired                                           | ?         | NA          | Dead                | ?             |
| 82                 | M/41    | Zhejiang              | Civil servant                                     | ?         | NA          | Discharged          | ?             |
| 83                 | M/38    | Henan                 | Butcher                                           | ?         | NA          | Critical            | 0/7           |
| 84                 | F/26    | Jiangsu               | ?                                                 | ?         | NA          | Critical            | 0/5           |
| 85                 | F/80    | Shanghai              | ?                                                 | 9 Apr 13  | 8           | Stable              | 0/7           |
| 86                 | F/54    | Zhejiang              | Self-employed                                     | 13 Apr 13 | 4           | Critical            | ?             |
| 87                 | M/69    | Zhejiang              | Retired                                           | 11 Apr 13 | 6           | Dead (8)            | ?             |
| 88                 | M/54    | Jiangsu               | ?                                                 | 9 Apr 13  | 8           | Critical            | 0/4           |
| 89                 | M/43    | Zhejiang              | Unemployed                                        | 12 Apr 13 | 6           | Critical            | ?             |

|     |      |                               |                                  |           |             |                 |      |
|-----|------|-------------------------------|----------------------------------|-----------|-------------|-----------------|------|
| 90  | M/48 | Zhejiang                      | Office worker                    | 11 Apr 13 | 8           | Critical        | ?    |
| 91  | F/66 | Zhejiang                      | Farmer                           | 10 Apr 13 | 9           | Critical        | ?    |
| 92  | M/43 | Jiangsu                       | ?                                | 7 Apr 13  | 13          | Critical        | 0/23 |
| 93  | M/56 | Zhejiang                      | Farmer                           | 11 Apr 13 | 8           | Critical        | ?    |
| 94  | F/35 | Zhejiang                      | Worker                           | 14 Apr 13 | 5           | Critical        | ?    |
| 95  | M/37 | Zhejiang                      | Driver                           | 30 Mar 13 | 20          | Critical        | ?    |
| 96  | F/75 | Shanghai                      | ?                                | 13 Apr 13 | 6           | Stable          | 0/15 |
| 97  | F/68 | Zhejiang                      | Farmer                           | 12 Apr 13 | $\leq 9^*$  | Critical        | ?    |
| 98  | M/76 | Zhejiang                      | Farmer                           | 8 Apr 13  | $\leq 13^*$ | Dead (13)       | ?    |
| 99  | F/81 | Zhejiang                      | Unemployed                       | 12 Apr 13 | $\leq 9^*$  | Critical        | ?    |
| 100 | M/58 | Zhejiang                      | Unemployed                       | 16 Apr 13 | $\leq 5^*$  | Critical        | ?    |
| 101 | F/79 | Zhejiang                      | Farmer                           | 13 Apr 13 | $\leq 8^*$  | Critical        | ?    |
| 102 | M/68 | Jiangsu                       | Retired                          | 13 Apr 13 | 7           | Critical        | 0/3  |
| 103 | F/54 | Zhejiang                      | Office worker                    | 16 Apr 13 | $\leq 6^*$  | Mild            | ?    |
| 104 | M/32 | Zhejiang                      | Farmer                           | 14 Apr 13 | $\leq 8^*$  | Mild            | ?    |
| 105 | M/36 | Shandong                      | Construction material wholesaler | 15 Apr 13 | 7           | Critical        | 0/9  |
| 106 | M/91 | Anhui                         | Retired                          | 14 Apr 13 | 8           | Critical        | 0/35 |
| 107 | M/84 | Zhejiang                      | Retired                          | 15 Apr 13 | $\leq 8^*$  | Critical        | ?    |
| 108 | M/62 | Zhejiang                      | Farmer                           | 15 Apr 13 | $\leq 8^*$  | Critical        | ?    |
| 109 | M/53 | Taipei, Taiwan (from Jiangsu) | Businessman                      | 12 Apr 13 | 12          | Discharged (42) | 0/3  |
| 110 | M/56 | Henan                         | ?                                | 17 Apr 13 | 8           | Critical        | 0/7  |
| 111 | F/60 | Zhejiang                      | Farmer                           | 17 Apr 13 | 8           | Critical        | ?    |
| 112 | F/50 | Zhejiang                      | Farmer                           | 18 Apr 13 | 7           | Critical        | ?    |
| 113 | M/69 | Jiangxi                       | Retired                          | 19 Apr 13 | 6           | Critical        | 0/14 |
| 114 | M/38 | Zhejiang                      | Farmer                           | 17 Apr 13 | 9           | Critical        | ?    |
| 115 | M/65 | Fujian                        | ?                                | 18 Apr 13 | 8           | Critical        | 0/37 |
| 116 | M/49 | Jiangsu                       | ?                                | 17 Apr 13 | 9           | Mild            | ?    |
| 117 | M/36 | Jiangsu                       | ?                                | 19 Apr 13 | 7           | Critical        | ?    |
| 118 | M/60 | Jiangsu                       | ?                                | 8 Mar 13  | 49          | Critical        | ?    |
| 119 | F/76 | Jiangxi                       | Farmer                           | 19 Apr 13 | 7           | Critical        | 0/10 |
| 120 | F/64 | Hunan                         | ?                                | 14 Apr 13 | 13          | Critical        | 0/41 |
| 121 | M/54 | Jiangxi                       | Pork seller                      | 15 Apr 13 | 12          | Critical        | 0/51 |
| 122 | M/80 | Jiangxi                       | Farmer                           | 21 Apr 13 | 7           | Stable          | 0/8  |
| 123 | F/31 | Jiangxi                       | Vegetable seller                 | 23 Apr 13 | 5           | Critical        | 0/11 |

|     |      |          |                  |             |    |                 |      |
|-----|------|----------|------------------|-------------|----|-----------------|------|
| 124 | M/4  | Shandong | ?                | 27 Apr 13   | 1  | Stable          | ?    |
| 125 | M/80 | Fujian   | Farmer           | 17 Apr 13   | 11 | Critical        | 0/33 |
| 126 | M/38 | Zhejiang | Farmer           | 18 Apr 13   | 10 | Critical        | ?    |
| 127 | M/58 | Fujian   | Transport worker | 21 Apr 13   | 9  | Critical        | ?    |
| 128 | M/69 | Hunan    | Farmer           | 23 Apr 13   | 8  | Critical        | 0/50 |
| 129 | M/69 | Fujian   | Farmer           | 29 Apr 13   | 5  | Critical        | 0/9  |
| 130 | M/9  | Fujian   | ?                | 26 Apr 13   | 10 | Recovered       | ?    |
| 131 | F/79 | Jiangxi  | Farmer           | 3 May 13    | 4  | Stable          | 0/11 |
| 132 | M/6  | Beijing  | ?                | 21 May 2013 | 7  | Discharged (10) | 0/58 |

**Abbreviations:** A1, asymptomatic case 1; NA, not applicable; ?, not reported

\*Date of reporting by Ministry of Health of China used because date of laboratory diagnosis was not available.

†Cases 73-77 were diagnosed retrospectively from archived specimens.

‡The exact date of symptom onset was not available.

§: A total of 40 fatalities were reported as of 26 June 2013, but the identities of some patients were not specified.

**Supplementary Table 2.** Origin of the sequences of 2013/A(H7N9) obtained from GISAID in Table 2. We gratefully acknowledge the authors, originating and submitting laboratories of the sequences from GISAID's EpiFlu™ Database on which this research is based. The list is detailed below.

| Segment ID | Segment | Country | Collection date | Isolate name   | Originating laboratory | Submitting laboratory                 | Authors |
|------------|---------|---------|-----------------|----------------|------------------------|---------------------------------------|---------|
| EPI439504  | PB2     | China   | 2013            | A/Anhui/1/2013 | N/A                    | WHO Chinese National Influenza Center | N/A     |
| EPI439508  | PB1     | China   | 2013            | A/Anhui/1/2013 | N/A                    | WHO Chinese National Influenza Center | N/A     |
| EPI439507  | H       | China   | 2013            | A/Anhui/1/2013 | N/A                    | WHO Chinese National Influenza Center | N/A     |
| EPI439509  | N       | China   | 2013            | A/Anhui/1/2013 | N/A                    | WHO Chinese National                  | N/A     |

|           |     |       |      |                   |     |                                       |     |
|-----------|-----|-------|------|-------------------|-----|---------------------------------------|-----|
|           |     |       |      |                   |     | Influenza Center                      |     |
| EPI439506 | MP  | China | 2013 | A/Anhui/1/2013    | N/A | WHO Chinese National Influenza Center | N/A |
| EPI439510 | NS  | China | 2013 | A/Anhui/1/2013    | N/A | WHO Chinese National Influenza Center | N/A |
| EPI439495 | PB2 | China | 2013 | A/Shanghai/2/2013 | N/A | WHO Chinese National Influenza Center | N/A |
| EPI439501 | PB1 | China | 2013 | A/Shanghai/2/2013 | N/A | WHO Chinese National Influenza Center | N/A |
| EPI439502 | H   | China | 2013 | A/Shanghai/2/2013 | N/A | WHO Chinese National Influenza Center | N/A |
| EPI439500 | N   | China | 2013 | A/Shanghai/2/2013 | N/A | WHO Chinese National Influenza Center | N/A |
| EPI439497 | MP  | China | 2013 | A/Shanghai/2/2013 | N/A | WHO Chinese National Influenza Center | N/A |
| EPI439499 | NS  | China | 2013 | A/Shanghai/2/2013 | N/A | WHO Chinese National                  | N/A |

|           |     |       |      |                   |     |                                       |     |
|-----------|-----|-------|------|-------------------|-----|---------------------------------------|-----|
|           |     |       |      |                   |     | Influenza Center                      |     |
| EPI439488 | PB2 | China | 2013 | A/Shanghai/1/2013 | N/A | WHO Chinese National Influenza Center | N/A |
| EPI439489 | PB1 | China | 2013 | A/Shanghai/1/2013 | N/A | WHO Chinese National Influenza Center | N/A |
| EPI439486 | H   | China | 2013 | A/Shanghai/1/2013 | N/A | WHO Chinese National Influenza Center | N/A |
| EPI439487 | N   | China | 2013 | A/Shanghai/1/2013 | N/A | WHO Chinese National Influenza Center | N/A |
| EPI439493 | MP  | China | 2013 | A/Shanghai/1/2013 | N/A | WHO Chinese National Influenza Center | N/A |
| EPI439494 | NS  | China | 2013 | A/Shanghai/1/2013 | N/A | WHO Chinese National Influenza Center | N/A |

N/A: not available

\*All submitters of data may be contacted directly via the GISAID website [www.gisaid.org](http://www.gisaid.org)
